# Supplementary material for: An Italian Validation of the 5-Item Attitudes to Mental Illness Questionnaire (AMIQ): A Useful Tool for Rapid Assessment of Stigma, Acceptance, and Tolerance
Source: MDPI journal article supplement (doi:10.3390/healthcare12030395), 2024-02-03

**Figure S1.** Distribution of the answers for each item of the questionnaire during the pre-test phase

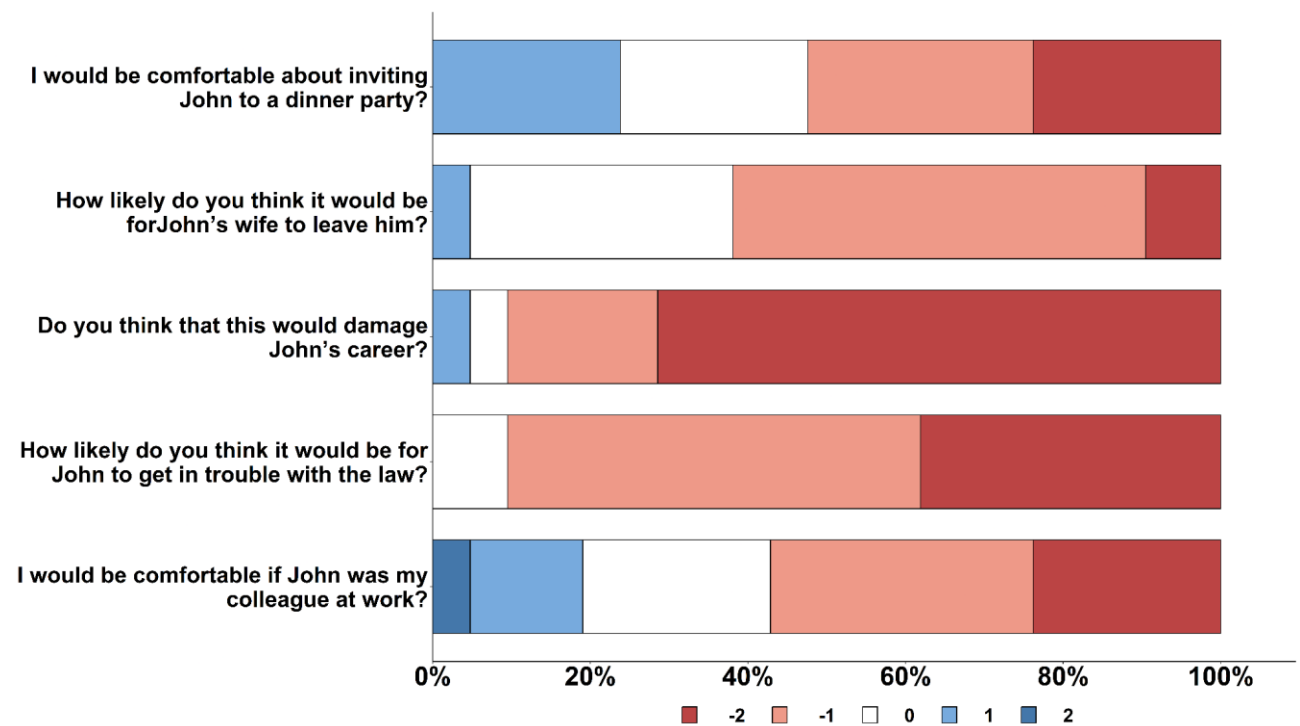

Supplement: s1 [file s1]
